# Supplementary material for: A Comparative Study on the Effects of the Lysine Reagent Pyridoxal 5-Phosphate and Some Thiol Reagents in Opening the Tl+-Induced Mitochondrial Permeability Transition Pore
Source: MDPI journal article supplement (doi:10.3390/ijms24032460), 2023-01-27
Supplement: s1 [file s1]

# Supplementary Material

Supplementary data for the manuscript:

**Comparative study effects of the lysine reagent pyridoxal 5-phosphate and some thiol reagents in opening the  $\text{TI}^+$ -induced permeability transition pore in experiments in vitro with calcium-loaded rat liver mitochondria**

**Sergey M. Korotkov and Artemy V. Novozhilov**

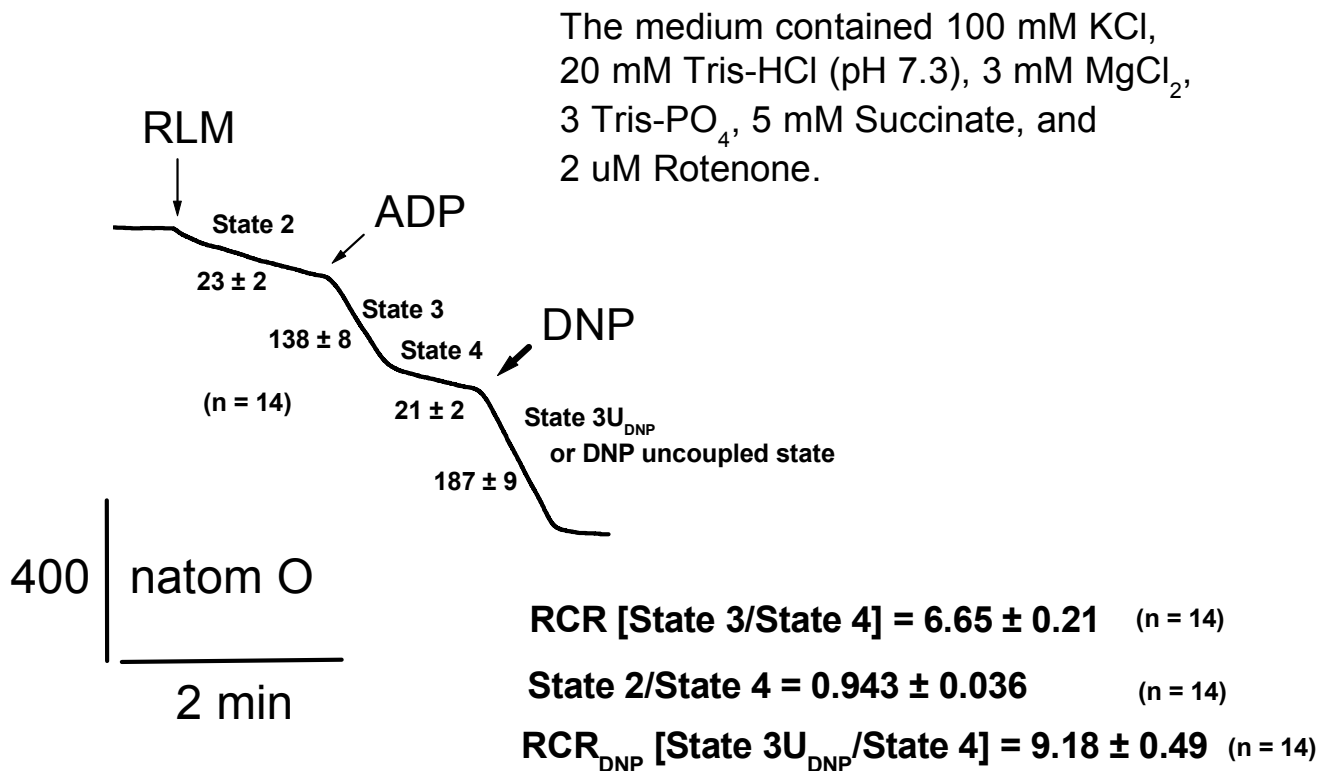

Typical oxygraphs and RCR for control RLM experiments *in vitro*

**Figure S1.** Typical oxygraph and RCR to control rat liver mitochondrial preparations.

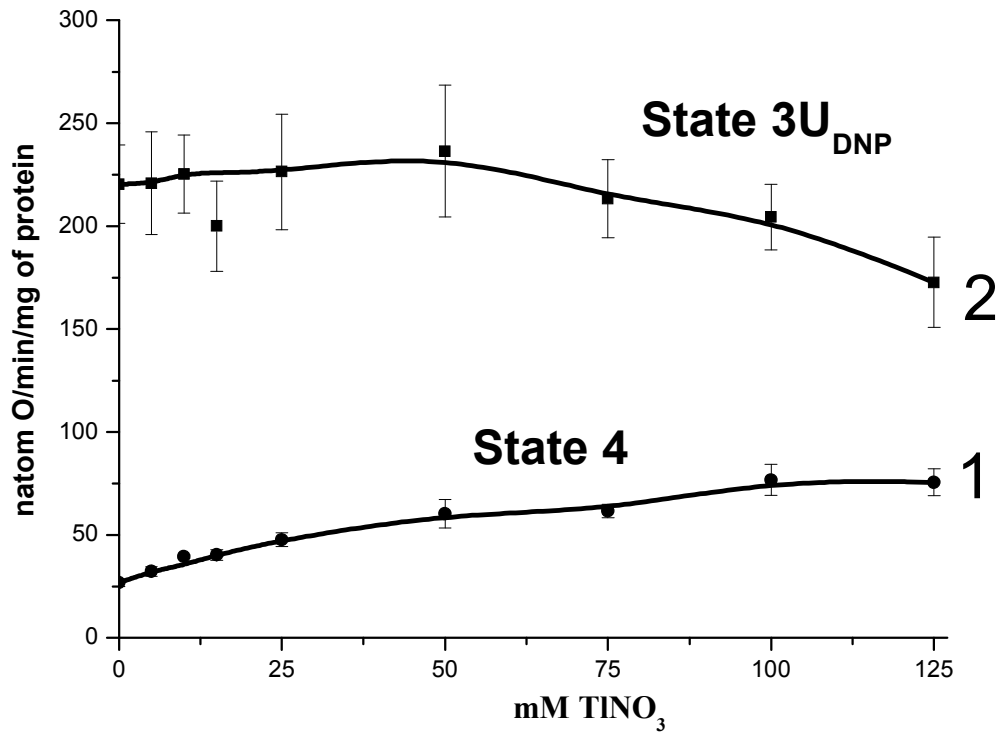

**Figure S2.** Effect of  $\text{Tl}^+$  on oxygen consumption rates (natom O min/mg of protein) in succinate-energized rat liver mitochondria. Mitochondria (1.5 mg/mL of protein) were injected in sucrose-adjusted 280 mOsm medium containing 0-125 mM  $\text{TlNO}_3$  (traces 1 and 2) and 5 mM Tris- $\text{NO}_3$  (pH 7.3), 5 mM succinate, 4  $\mu\text{M}$  rotenone, 3 mM  $\text{Mg}(\text{NO}_3)_2$ , and 3 mM Tris- $\text{P}_i$ . 2,4-dinitrophenol (DNP) of 30  $\mu\text{M}$  was administered into the medium to trigger DNP-stimulated respiration (trace 2) after 2 min recording of state 4 (trace 1). Error bars were calculated by the Muller formula from rates found for three different mitochondrial preparations.

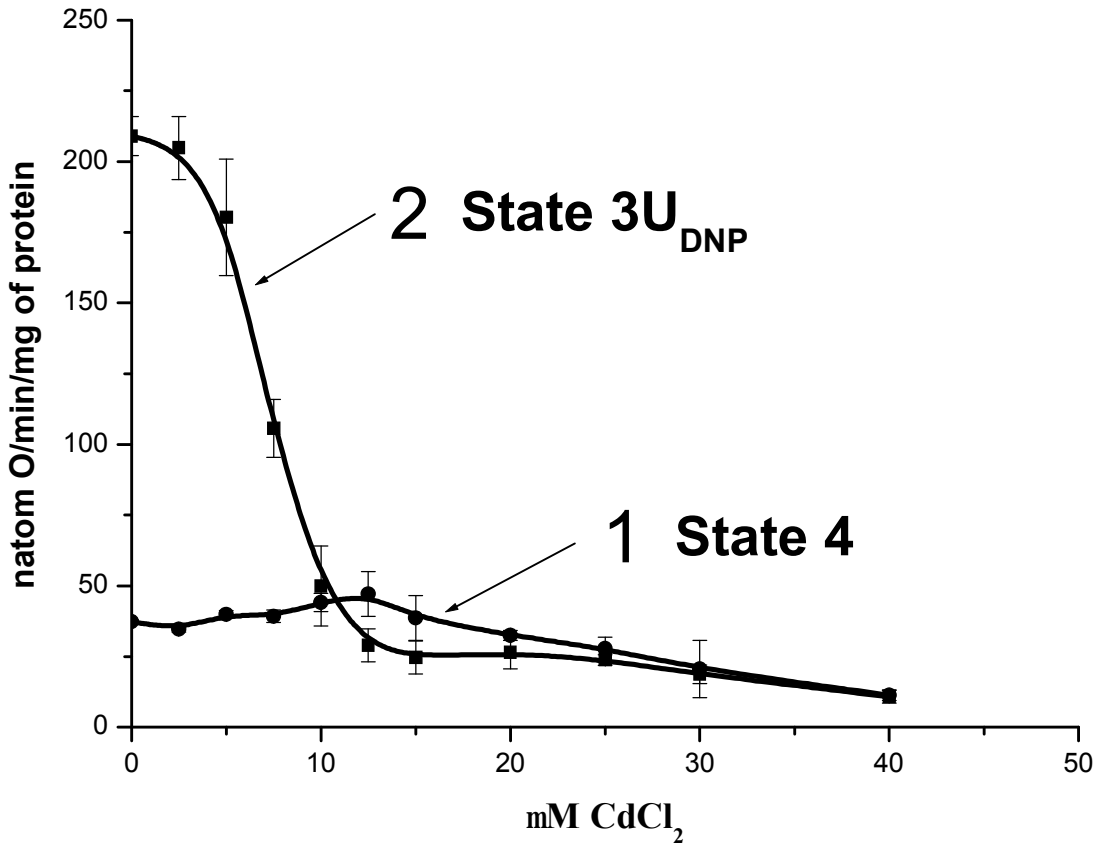

**Figure S3.** Effect of  $\text{Cd}^{2+}$  on oxygen consumption rates (natom O min/mg of protein) in succinate-energized rat liver mitochondria. Mitochondria (2 mg/mL of protein) were injected in 280 mOsm medium containing 100 mM KCl (traces 1 and 2), 20 mM Tris-HCl (pH 7.3), 5 mM succinate, 4  $\mu\text{M}$  rotenone, 3 mM  $\text{MgCl}_2$ , and 3 mM Tris- $\text{P}_i$ . 2,4-dinitrophenol (DNP) of 30  $\mu\text{M}$  was administered into the medium to trigger DNP-stimulated respiration (trace 2) after 2 min recording of state 4 (trace 1). Error bars were calculated by the Muller formula from rates found for three different mitochondrial preparations.

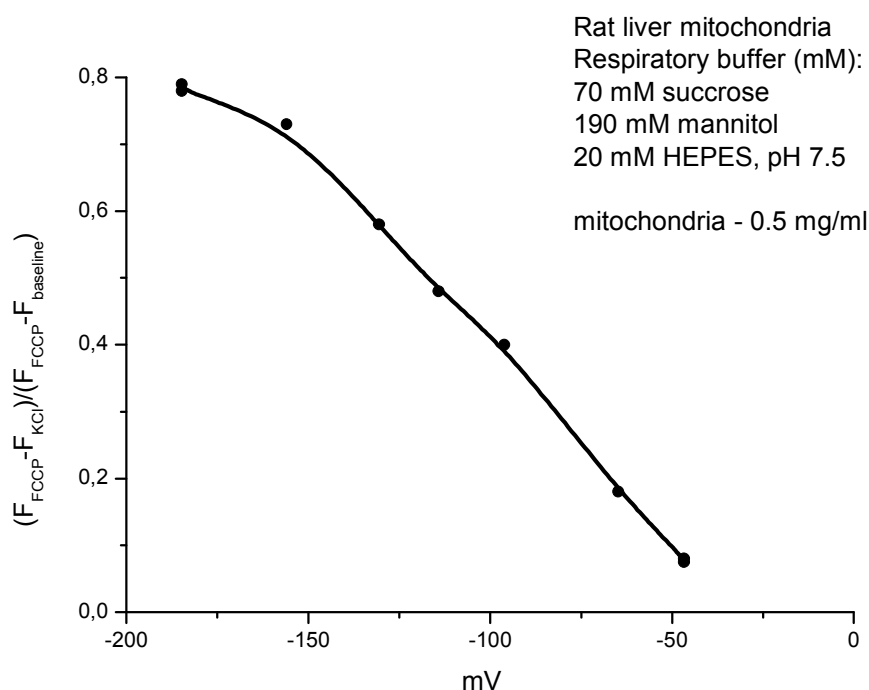

**Figure S4.** Calibration in the dependence of safranin fluorescence on  $\Delta\Psi$ . The safranin fluorescence was evaluated at 20 °C using a Shimadzu RF-1501 spectrofluorimeter (Shimadzu, Japan) at 485/590 nm wavelength (excitation/emission). To record  $F_{baseline}$  (2 min), mitochondria (0.5 mg/ml of protein) were injected into a quartz transparent cuvette filled by 3 ml of the medium containing 190 mM mannitol, 70 mM sucrose, 5  $\mu$ M rotenone, 2.5  $\mu$ M safranin, 20 nM valinomycin, 4  $\mu$ g/ml of oligomycin, and 20 mM HEPES, brought to pH 7.5 with 1 M NaOH. To register  $F_{KCl}$  (2 min), concentrated KCl solution was farther injected into the cuvette to reach final concentrations of 0.1, 0.3, 0.8, 1.5, 3, 10, and 20 mM  $K^+$ . Finally, 1  $\mu$ M FCCP was added into the cuvette with subsequent 2 min registration of  $F_{FCCP}$ . From these data,  $(F_{FCCP} - F_{KCl}) / (F_{FCCP} - F_{baseline})$  was calculated for each measurement and plotted against  $\Delta\Psi$ , calculated using the Nernst equation.

**Table S1ab**

Effects of pyridoxal 5 phosphate (P5P) on swelling ( $\Delta A_{540}$ ) of succinate-energized rat liver mitochondria

| <b>P5P<br/>(mM)</b> | <b>free of <math>\text{Ca}^{2+}</math></b> |          | <b>100 <math>\mu\text{M}</math> <math>\text{Ca}^{2+}</math></b> |          | <b>100 <math>\mu\text{M}</math> <math>\text{Ca}^{2+}</math> + ADP</b> |          |
|---------------------|--------------------------------------------|----------|-----------------------------------------------------------------|----------|-----------------------------------------------------------------------|----------|
|                     | $\Delta A_{540} \pm \text{SEM}$            | P value  | $\Delta A_{540} \pm \text{SEM}$                                 | P value  | $\Delta A_{540} \pm \text{SEM}$                                       | P value  |
| 0                   | -0.010 $\pm$ 0.001 (9)                     | P < 0.01 | -0.201 $\pm$ 0.011 (9)                                          | -        | -0.009 $\pm$ 0.001 (9)                                                | P < 0.01 |
| 2                   | -0.008 $\pm$ 0.001 (5)                     | P < 0.01 | -0.199 $\pm$ 0.019 (7)                                          | *        | -0.020 $\pm$ 0.001 (6)                                                | P < 0.01 |
| 4                   | -0.011 $\pm$ 0.001 (5)                     | P < 0.01 | -0.213 $\pm$ 0.010 (7)                                          | *        | -0.022 $\pm$ 0.004 (5)                                                | P < 0.01 |
| 6                   | -0.014 $\pm$ 0.001 (5)                     | P < 0.01 | -0.233 $\pm$ 0.010 (8)                                          | P < 0.05 | -0.053 $\pm$ 0.010 (8)                                                | P < 0.01 |

The changes in  $\Delta A_{540}$  were detected within four minute interval after addition of mitochondria (see Figs. 1a and 1b) and presented as Means  $\pm$  SEM. The number of experiments showed in parentheses. P-values were accordingly calculated to experiments free of P5P (A) or 100  $\mu\text{M}$   $\text{Ca}^{2+}$  (B). Asterisks indicate that statistical difference between appropriate  $\Delta A_{540}$  values is not statistically significant.

**Table S1c**

Effects of 6 mM pyridoxal 5 phosphate (P5P) on swelling ( $\Delta A_{540}$ ) of succinate-energized and calcium-loaded rat liver mitochondria in the presence of MPTP inhibitors

| MPTP inhibitors                                         | $\Delta A_{540} \pm \text{SEM}$ | P value  |
|---------------------------------------------------------|---------------------------------|----------|
| control ( $\text{Ca}^{2+}$ alone and free of additions) | -0.201 $\pm$ 0.011 (9)          | -        |
| P5P                                                     | -0.233 $\pm$ 0.010 (8)          | P < 0.05 |
| P5P + CsA                                               | -0.248 $\pm$ 0.010 (3)          | P < 0.04 |
| P5P + ADP                                               | -0.053 $\pm$ 0.010 (8)          | P < 0.01 |
| P5P + NEM                                               | -0.046 $\pm$ 0.009 (3)          | P < 0.01 |
| P5P + CsA + NEM                                         | -0.045 $\pm$ 0.008 (3)          | P < 0.01 |
| P5P + ADP + CsA                                         | -0.014 $\pm$ 0.006 (3)          | P < 0.01 |
| P5P + ADP + NEM                                         | -0.018 $\pm$ 0.004 (3)          | P < 0.01 |

The changes in  $\Delta A_{540}$  were detected within four minute interval after addition of mitochondria (see Figs. 1c) and presented as Means  $\pm$  SEM. The number of experiments showed in parentheses. P-values were accordingly calculated to experiments with and 100  $\mu\text{M}$   $\text{Ca}^{2+}$  and free of P5P. Asterisks indicate that statistical difference between appropriate  $\Delta A_{540}$  values is not statistically significant.

**Table S1de**Effects of thiol reagents on swelling ( $\Delta A_{540}$ ) of succinate-energized rat liver mitochondria

| thiol reagents                 | free of $\text{Ca}^{2+}$        |          | 100 $\mu\text{M}$ $\text{Ca}^{2+}$ |          |
|--------------------------------|---------------------------------|----------|------------------------------------|----------|
|                                | $\Delta A_{540} \pm \text{SEM}$ | P value  | $\Delta A_{540} \pm \text{SEM}$    | P value  |
| free of thiol reagents         | -0.016 $\pm$ 0.002 (9)          | -        | -0.205 $\pm$ 0.007 (6)             | -        |
| 6 mM P5P                       | -0.095 $\pm$ 0.005 (8)          | *        | -0.261 $\pm$ 0.010 (8)             | P < 0.01 |
| 10 $\mu\text{M}$ EMA           | 0.002 $\pm$ 0.006 (3)           | P < 0.05 | -0.252 $\pm$ 0.009 (3)             | *        |
| 50 $\mu\text{M}$ NEM (NEM(1))  | -0.097 $\pm$ 0.009 (3)          | P < 0.01 | -0.195 $\pm$ 0.012 (3)             | *        |
| 500 $\mu\text{M}$ NEM (NEM(2)) | -0.343 $\pm$ 0.022 (3)          | P < 0.01 |                                    |          |
| 100 $\mu\text{M}$ tBHP         | -0.412 $\pm$ 0.016 (3)          | P < 0.01 | -0.241 $\pm$ 0.015 (3)             | P < 0.05 |
| 5 $\mu\text{M}$ PAO            | -0.534 $\pm$ 0.011 (3)          | P < 0.01 | -0.355 $\pm$ 0.018 (3)             | P < 0.01 |

The changes in  $\Delta A_{540}$  were detected within seven minute interval after addition of mitochondria (see Figs. 1d and 1e) and presented as Means  $\pm$  SEM. The number of experiments showed in parentheses. P-values were accordingly calculated to experiments free of P5P (D) or 100  $\mu\text{M}$   $\text{Ca}^{2+}$  (E). Asterisks indicate that statistical difference between appropriate  $\Delta A_{540}$  values is not statistically significant.
